# Supplementary material for: Microbial diversity involved in iron and cryptic sulfur cycling in the ferruginous, low-sulfate waters of Lake Pavin
Source: PLOS journal article supplement (doi:10.1371/journal.pone.0212787), 2019-02-22
Supplement: S2 (10.1371/journal.pone.0212787.s002) [file journal.pone.0212787.s002]

**S1 File| Fe K-edge EXAFS analysis of enrichment culture with added lactate, dissolved Fe(II) and sulfate (FeLS).** left:  $k^3\chi(k)$  and right: Fourier Transform of the EXAFS signal. Black: data; red: fit. LCF analysis led to the identification of 3 components: mackinawite (88%), greigite (9%) and lepidocrocite (3%).

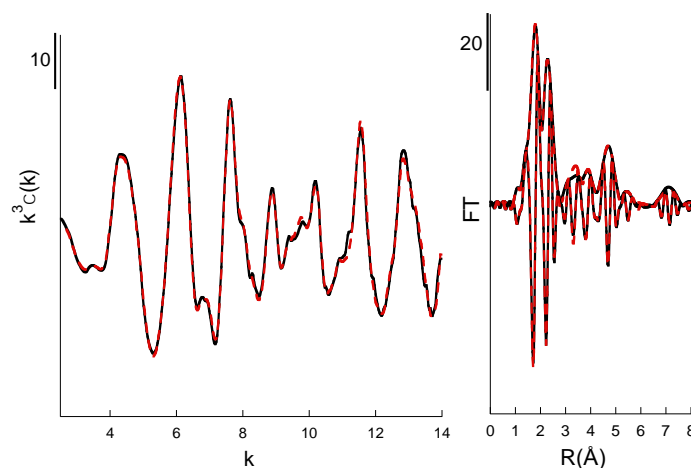

### X-Ray absorption spectroscopy

Sample FeLS was analyzed by X-ray absorption spectroscopy at the Fe K-edge. Vacuum dried sample was gently grinded in an agate mortar in the glovebox, mixed with an appropriate amount of cellulose to achieve an absorption edge height ( $\Delta\mu x$ ) as close as possible to 1, and compressed into pellet sealed with Kapton tape.

Fe K-edge XAS spectra were collected at 77 K (liquid  $N_2$ -cryostat) in transmission mode at the XAFS beamline (ELETTRA, Italy) using a Si(111) double-crystal monochromator. The energy was calibrated by setting the first inflection point of an Fe-foil K-edge recorded in double-transmission setup to 7112 eV. Extended X-ray Absorption Fine Structure (EXAFS) data were extracted using the program XAFS [1].  $k^3$ -weighted EXAFS spectra ( $2.5 - 14 \text{ \AA}^{-1}$  range) were analyzed using a Linear Combination Fit (LCF) [2,3] using the spectra from synthesized reference compounds (mackinawite, cf [4] ; greigite cf [5]; lepidocrocite cf [6]).

### References

1. Winterer M. XAFS - a data analysis program for material science. Journal of Physics (Paris). 1997: 243–244.

2. Adra A, Morin G, Ona-Nguema G, Menguy N, Maillot F, Casiot C, et al. Arsenic Scavenging by Aluminum-Substituted Ferrihydrites in a Circumneutral pH River Impacted by Acid Mine Drainage. *Environmental Science & Technology*. 2013;47: 12784–12792. doi:10.1021/es4020234
3. Miot J, Lu S, Morin G, Adra A, Benzerara K, Küsel K. Iron mineralogy across the oxycline of a lignite mine lake. *Chemical Geology*. 2016;434: 28–42. doi:10.1016/j.chemgeo.2016.04.013
4. Donald R, Southam G. Low temperature anaerobic bacterial diagenesis of ferrous monosulfide to pyrite. *Geochimica et Cosmochimica Acta*. 1999;63: 2019–2023. doi:10.1016/S0016-7037(99)00140-4
5. Chang Y-S, Savitha S, Sadhasivam S, Hsu C-K, Lin F-H. Fabrication, characterization, and application of greigite nanoparticles for cancer hyperthermia. *Journal of Colloid and Interface Science*. 2011;363: 314–319. doi:10.1016/j.jcis.2010.06.069
6. Miot J, Li J, Benzerara K, Sougrati MT, Ona-Nguema G, Bernard S, et al. Formation of single domain magnetite by green rust oxidation promoted by microbial anaerobic nitrate-dependent iron oxidation. *Geochimica et Cosmochimica Acta*. 2014;139: 327–343. doi:10.1016/j.gca.2014.04.047
